# Supplementary material
Source: Springer Nature journal article supplement (https://www.springermedizin.de/resource/supplementary/12882_2012_525_MOESM4_ESM.pdf/9453748)

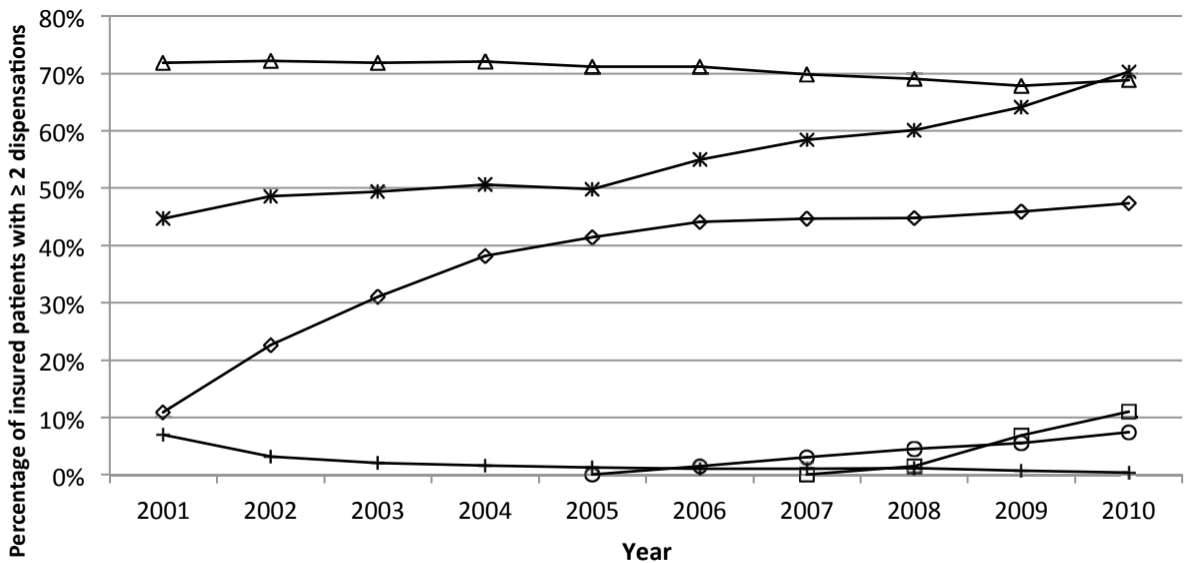

◆ Sevelamer    □ Lanthanum    ▲ Ca    + Mg and/or Al    ○ Cinacalcet    \* Vitamin D

Supplement: MOESM4 [file 9453748]
